# Supplementary material for: Bio-fabricated nanocomposite hydrogel with ROS scavenging and local oxygenation accelerates diabetic wound healing
Source: Royal Society of Chemistry journal article supplement (doi:10.1039/d2tb00343k), 2022-01-01
Supplement: d2tb00343k1.pdf [file d2tb00343k1.pdf]

## **Supplementary Information for**

# **Bio-fabricated nanocomposite hydrogel with ROS scavenging and local oxygenation accelerates diabetic wounds healing**

Yajie Pu,<sup>a</sup> Penghui Wang,<sup>a</sup> Rong Yang,<sup>a</sup> Xiaoyan Tan,<sup>a, b</sup> Tianqi Shi,<sup>a</sup> Juping Ma,<sup>a</sup>  
Wenliang Xue,<sup>a</sup> and Bo Chi<sup>\*\*</sup>,<sup>a, b</sup>

<sup>a</sup> State Key Laboratory of Materials-Oriented Chemical Engineering, College of Biotechnology and Pharmaceutical Engineering, College of Food Science and Light Industry, Nanjing Tech University, Nanjing, 211816, China

<sup>b</sup> Jiangsu National Synergetic Innovation Center for Advanced Materials, Nanjing Tech University, Nanjing, 211816, China

Corresponding authors:

Bo Chi\*: [chibo@njtech.edu.cn](mailto:chibo@njtech.edu.cn)

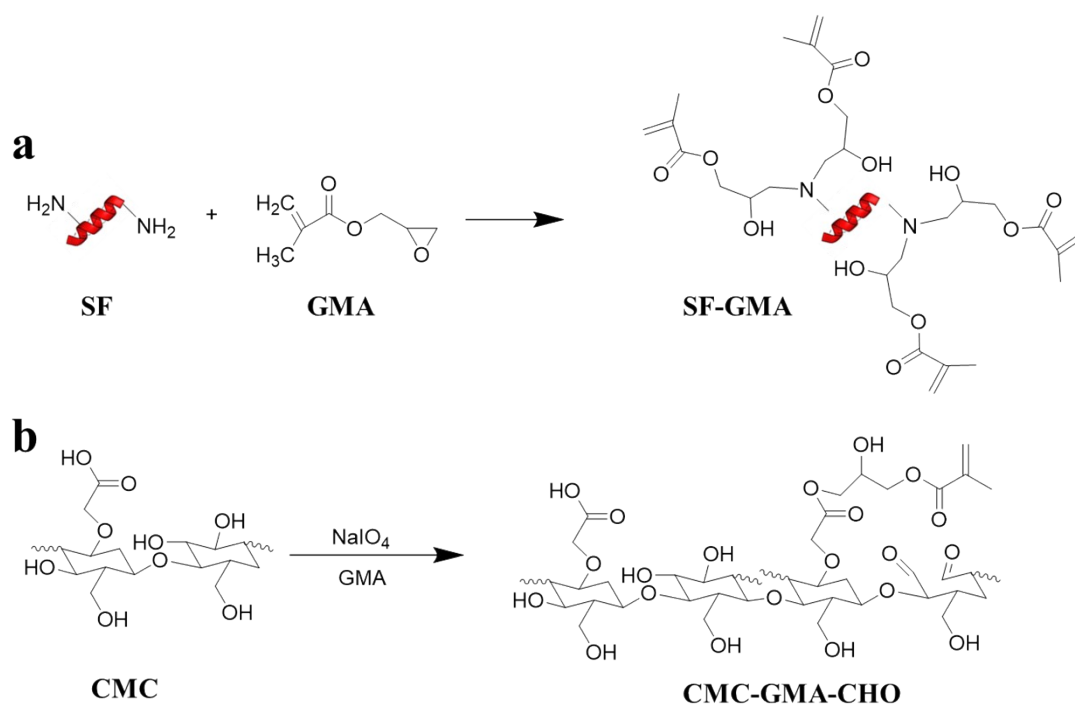

**Figure S1.** Reaction on SF and GMA leading to the formation of SF-GMA and the formation of CMC-GMA-CHO.

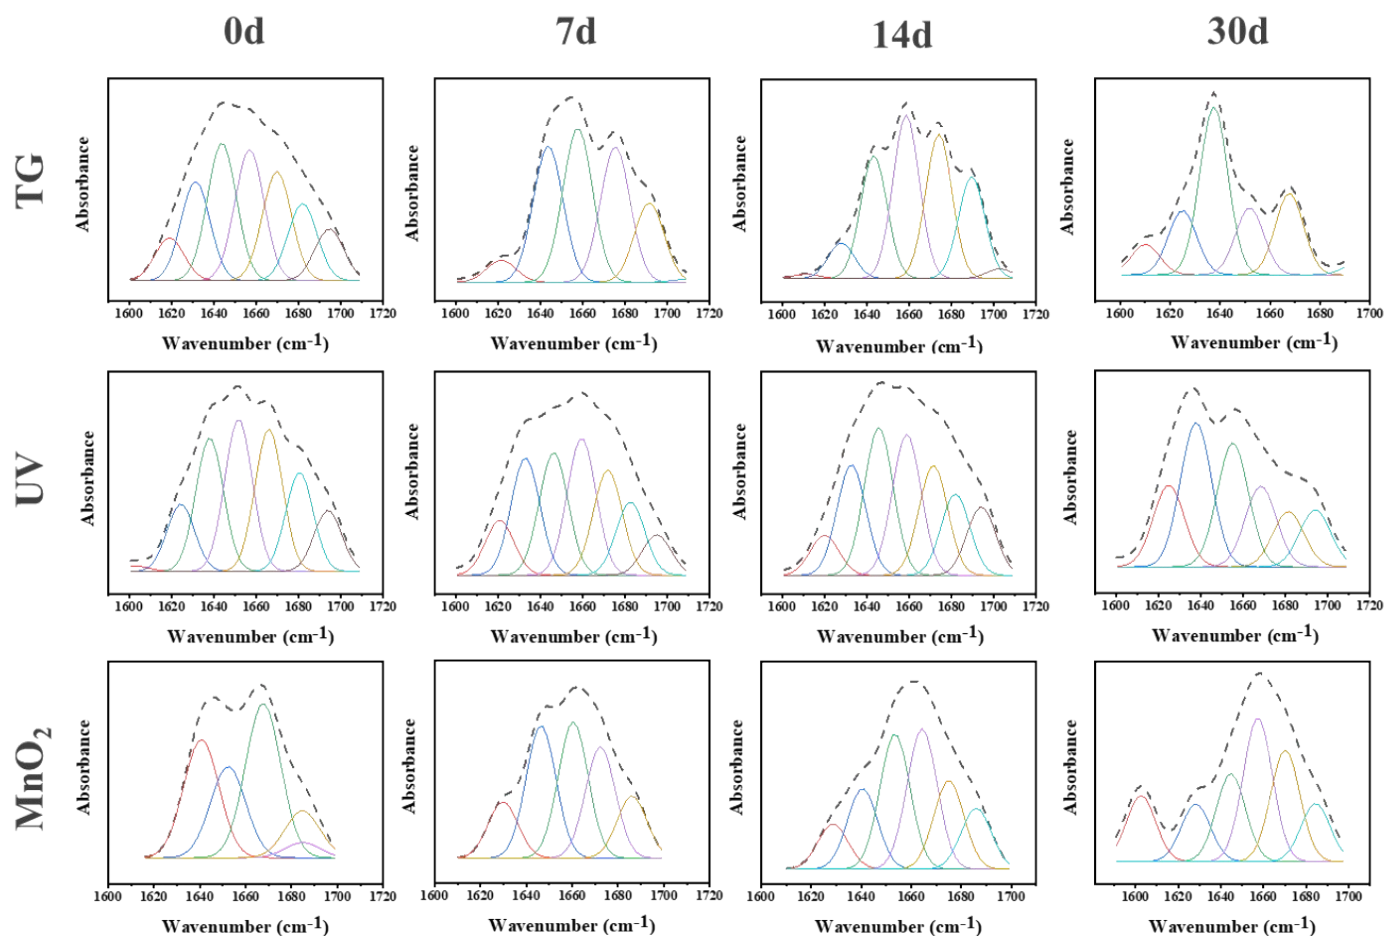

**Figure S2.** Secondary structures analysis of different freeze-dried hydrogel samples from amide I region of FTIR spectra. TG: SF/CMC hydrogels prepared only by enzymatic reaction; UV: SF/CMC hydrogels prepared by enzymatic reaction and UV-crosslinking reaction, MnO<sub>2</sub>: SF/CMC@MnO<sub>2</sub> hydrogels prepared by enzymatic reaction and UV-crosslinking reaction.

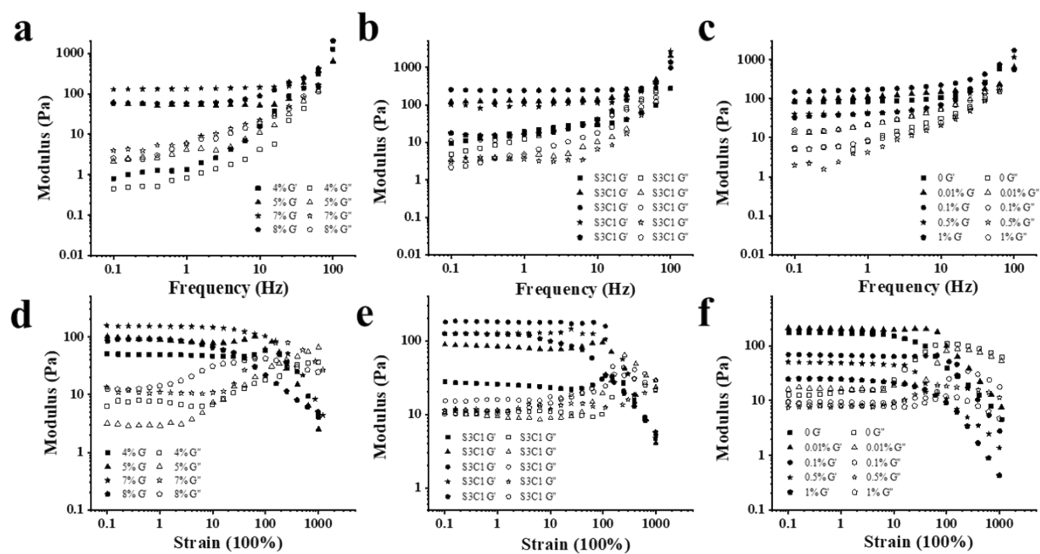

**Figure S3.** Rheological evaluation of SF/CMC and SF/CMC@MnO<sub>2</sub> hydrogels. Rheological properties of different hydrogel scaffolds SF/CMC and SF/CMC@MnO<sub>2</sub>: Frequency scanning and stress strain scanning of: a, d) Different solid content; b, e) Different proportioning; c, f) Different content of nanosheets.

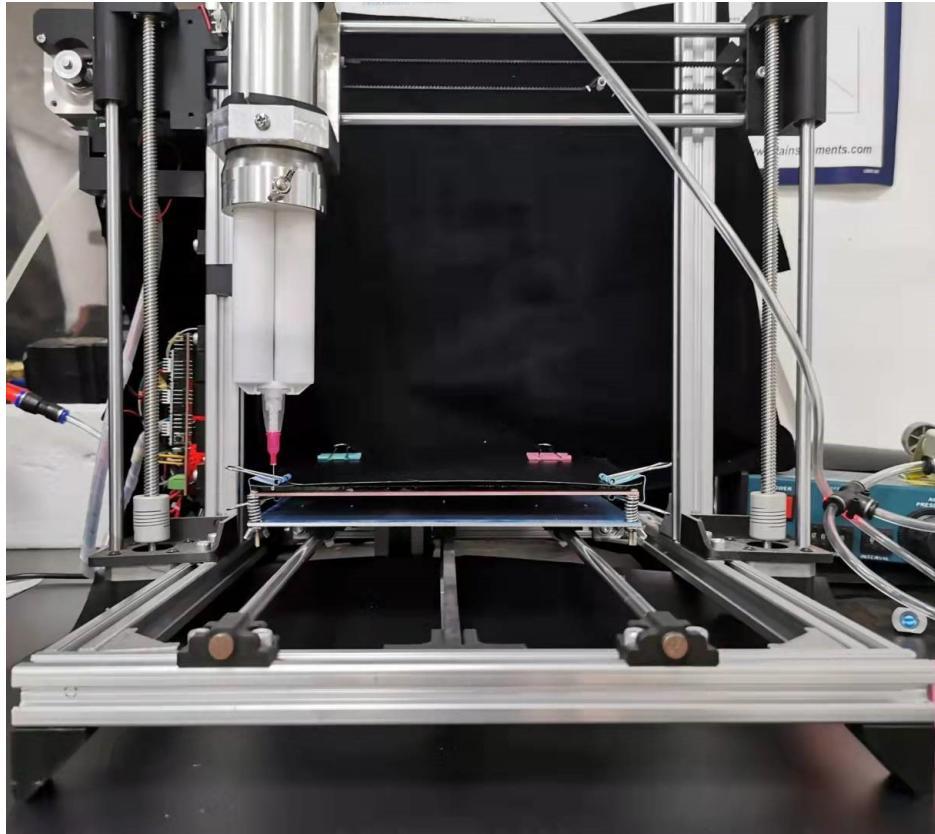

**Figure S4.** Image of 3D printer.

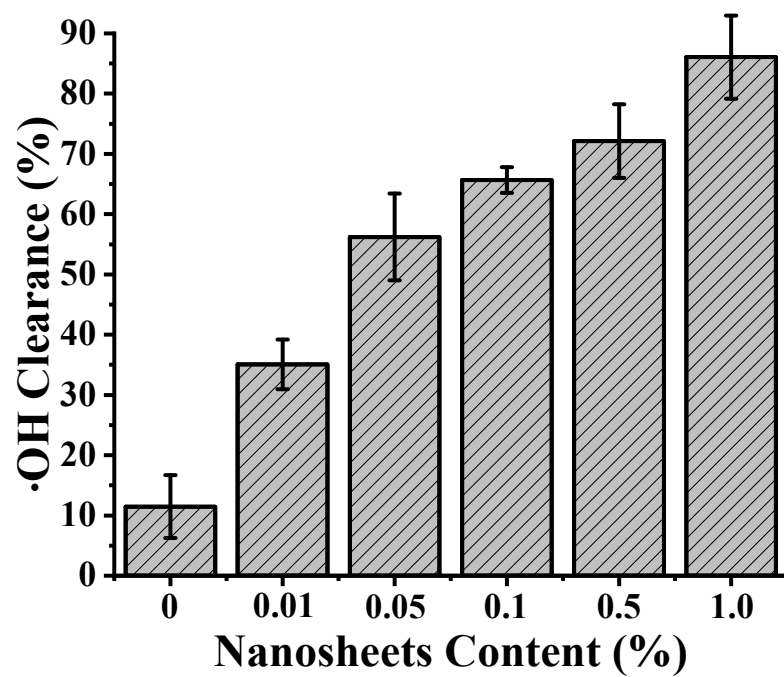

**Figure S5.** Display of clearance results of SF/CMC@MnO<sub>2</sub> hydrogels on hydroxyl radicals.

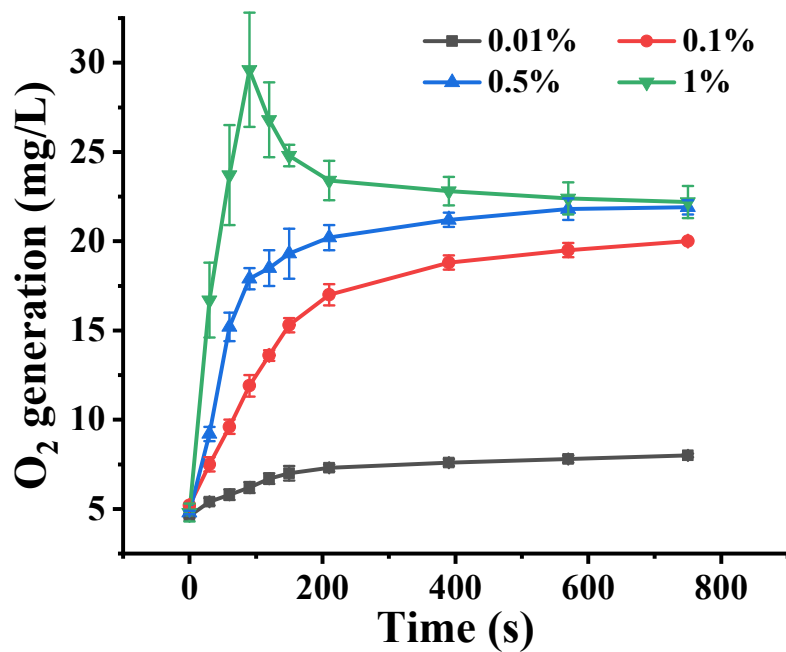

**Figure S6.** O<sub>2</sub> generation performance of the SF/CMC@MnO<sub>2</sub> hydrogels with different content of nanosheets.

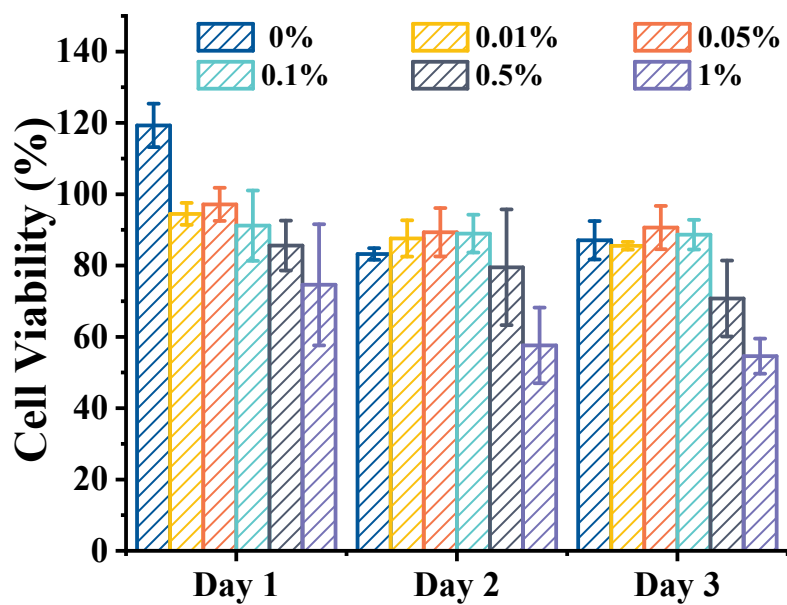

**Figure S7.** Evaluation of the cytocompatibility performance of hydrogels with different content of nanosheets.



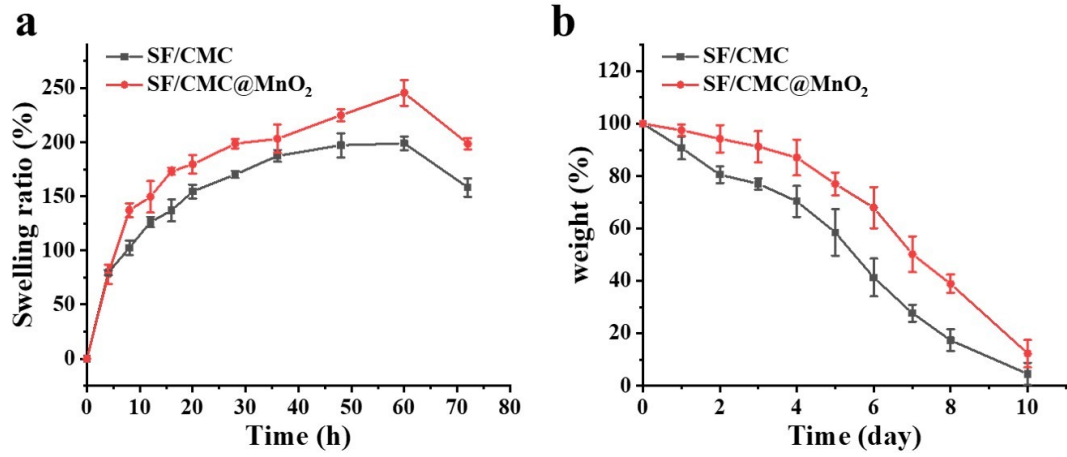

**Figure S8.** a) Swelling ratio of SF/CMC and SF/CMC@MnO<sub>2</sub> hydrogels; b) Degradation of SF/CMC and SF/CMC@MnO<sub>2</sub> hydrogels.
